# Supplementary material for: Preparation and characterization of mesoporous Zr-WOx/SiO2 catalysts for the esterification of 1-butanol with acetic acid
Source: Royal Society of Chemistry journal article supplement (doi:10.1039/c2jm30904a), 2012-01-01
Supplement: c2jm30904a.pdf [file c2jm30904a.pdf]

## †Electronic Supplementary Information (ESI)

### **Preparation and characterization of mesoporous Zr-WO<sub>x</sub>/SiO<sub>2</sub> catalysts for the esterification of 1-butanol with acetic acid**

**Tae Yong Kim<sup>a</sup>, Dae Sung Park<sup>a</sup>, Youngbo Choi<sup>a</sup>, Jayeon Baek<sup>a</sup>, Jae Ryul Park<sup>a</sup> and Jongheop Yi<sup>\*a</sup>**

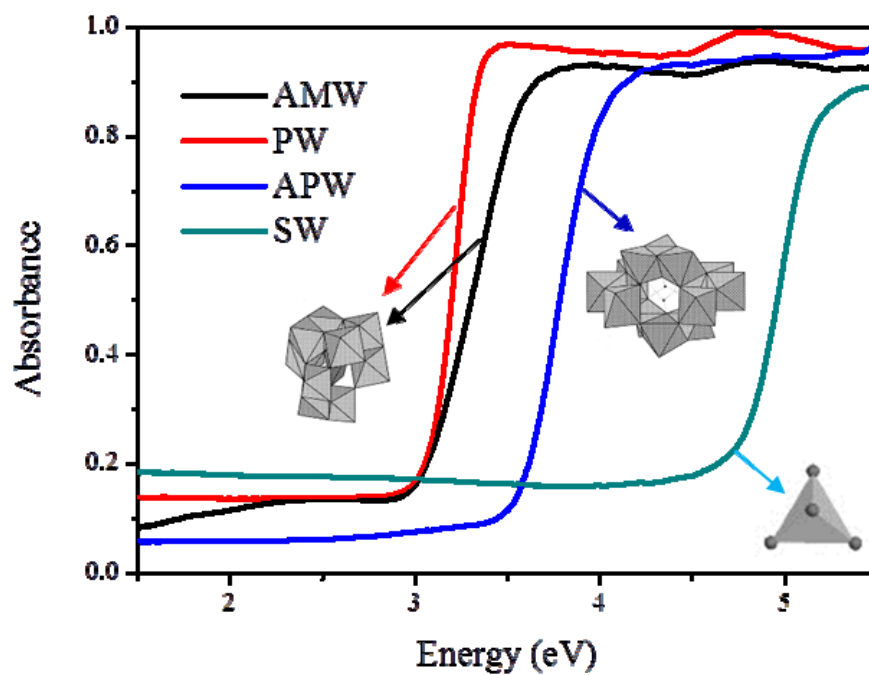

Fig. S1 UV-Vis spectra of model tungstate: Ammonium metatungstate (AMW), phosphotungstic acid (PW), ammonium paratungstate (APW), sodium tungstate (SW).

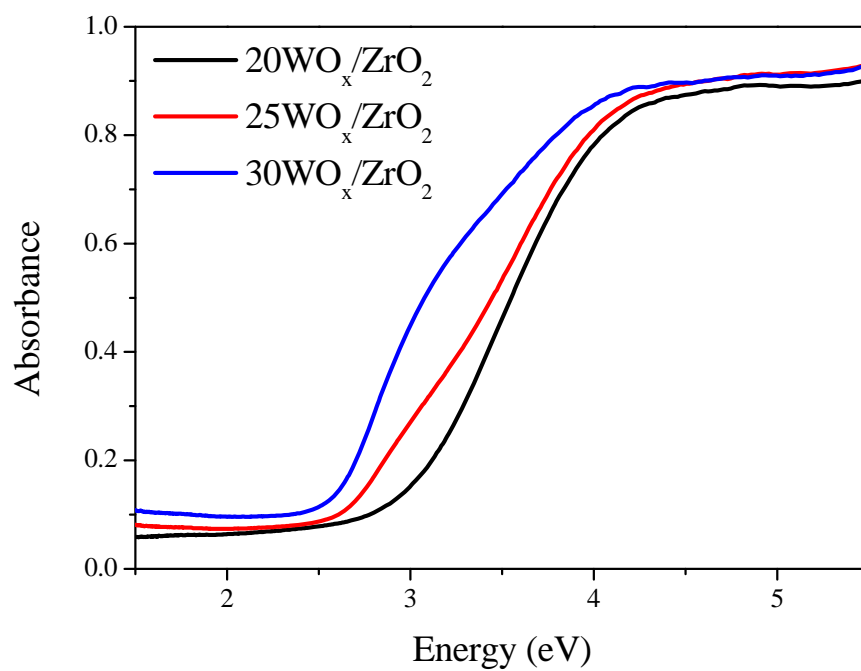

Fig. S2 UV-Vis spectra of supported WO<sub>x</sub>/ZrO<sub>2</sub> catalysts: Number denotes the wt% of WO<sub>x</sub>, calcined at 600oC

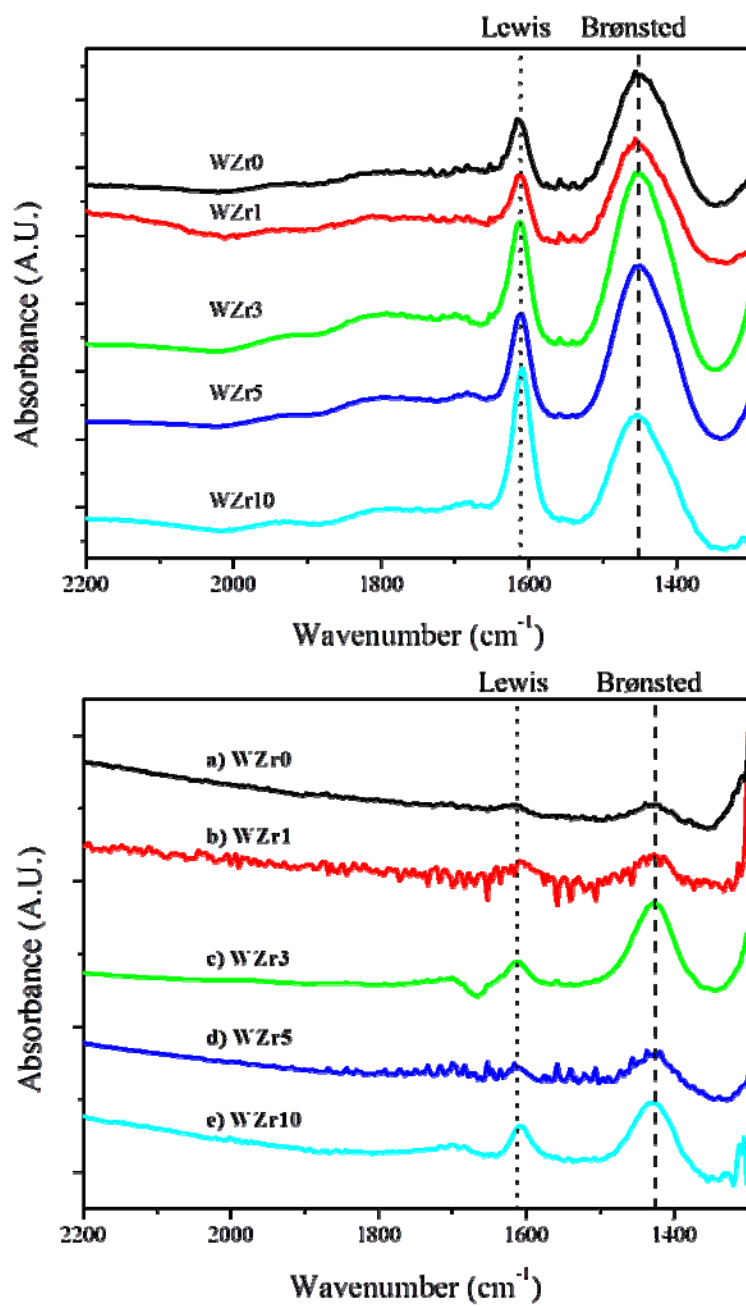

Fig. S3 NH<sub>3</sub> in-situ FTIR of WZrX catalysts: Evacuation at 30 °C (top) and 250 °C (bottom).

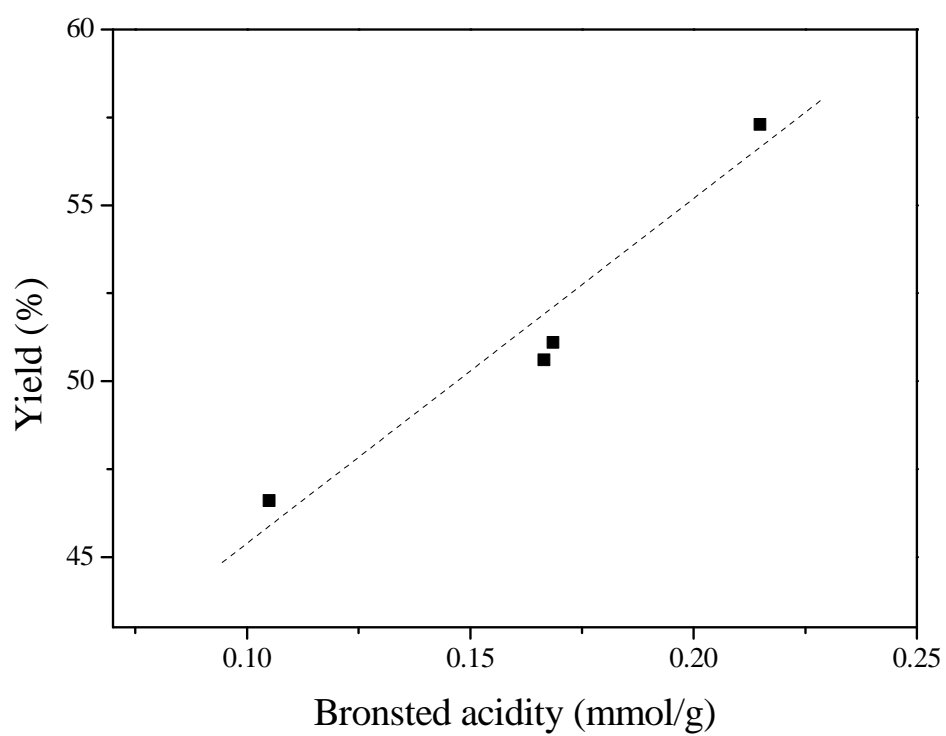

Fig. S4 Correlation between Bronsted acidity (at 150°C) and catalytic activity
